# Supplementary material
Source: Springer Nature journal article supplement (https://www.springermedizin.de/resource/supplementary/12950_2013_360_MOESM6_ESM.pdf/9557658)

**A****GTE co-incubation**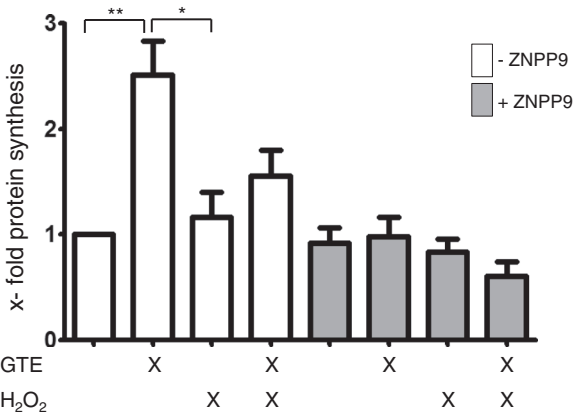

Supplement: MOESM6 [file 9557658]
